# Supplementary material for: Vitamin D–Binding Protein Modifies the Vitamin D–Bone Mineral Density Relationship
Source: PubMed Central journal article supplement (PMC3351032; doi:10.1002/jbmr.387), 2011-03-17
Supplement: NIHMS291564-supplement-Supplementary_Appendix.pdf [file NIHMS291564-supplement-Supplementary_Appendix.pdf]

## Supplementary Appendix 1. Derivation of Calculated Free and Bioavailable 25-hydroxyvitamin D from Vermuelen et al.

### DEFINITIONS

D = 25-hydroxyvitamin D (calcidiol), sum of both D2 and D3

Alb = albumin

DBP = Vitamin D binding protein, also known as Group-specific component or Gc

[D<sub>Alb</sub>] = concentration of albumin-bound vitamin D

[D<sub>DBP</sub>] = concentration of DBP-bound vitamin D

[D] = concentration of free (unbound) D

[Total] = concentration of Total 25OH-D = [D<sub>DBP</sub>] + [D<sub>Alb</sub>] + [D]

[Bio] = concentration of Bioavailable D (Bioavailable = sum of free and albumin-bound vitamin)  
= [D] + [D<sub>Alb</sub>]

K<sub>alb</sub> = affinity constant between vitamin D and albumin =  $6 \times 10^5 \text{ M}^{-1}$

K<sub>DBP</sub> = affinity constant between vitamin D and DBP =  $0.7 \times 10^9 \text{ M}^{-1}$

### EQUATIONS

#### Total 25(OH)-Vitamin D

[Total] = concentration of 25(OH)-Vitamin D in g/mol ÷ 400.5 g/mole

*Given that* [Total] = [D] + [D<sub>Alb</sub>] + [D<sub>DBP</sub>]

*thus* [D<sub>DBP</sub>] = [Total] - [D<sub>Alb</sub>] - [D] (Eq. 1)

#### Albumin

[Alb] = serum albumin concentration in g/L ÷ 66,430 g/mole

[D] + [Alb] ↔ [D<sub>Alb</sub>]

Albumin association constant K<sub>alb</sub> = [D<sub>Alb</sub>] ÷ ([D] · [Alb])

*Thus* [D<sub>Alb</sub>] = K<sub>alb</sub> · [Alb] · [D] (Eq. 2)

(NB: [Alb] in this example denotes the concentration of free non-vitamin bound albumin. However, given the low affinity between albumin and Vit. D, the concentrations of total albumin and unbound albumin are effectively equivalent ( $[Total\ Albumin] \approx [Alb]$ ). As a result, [Alb] may be estimated accurately by measurements of total serum albumin.)

## DBP

[Total DBP] = concentration of serum DBP in g/L  $\div$  58,000 g/mole

[DBP] = free unbound DBP *and*  $[D_{DBP}]$  = vitamin-bound DBP

*Given that*  $[D] + [DBP] \leftrightarrow [D_{DBP}]$

*And* DBP association constant  $K_{DBP} = [D_{DBP}] \div ([DBP] \cdot [D])$

*Thus*  $[D] = [D_{DBP}] \div K_{DBP} \div [DBP]$  (Eq. 3)

*Since* [Total DBP] = sum of bound and unbound DBP =  $[DBP] + [D_{DBP}]$

*Therefore*  $[DBP] = [Total\ DBP] - [D_{DBP}]$  (Eq. 4)

## Solving for Free 25(OH)-Vitamin D

*From Eqs. 3 and 4 we see that:*

$$[D] = [D_{DBP}] \div K_{DBP} \div ([Total\ DBP] - [D_{DBP}]) \quad (Eq. 5)$$

*If we substitute Eq. 1 into Eq. 2, we find that:*

$$[D_{DBP}] = [Total] - (K_{alb} \cdot [Alb] + 1) \cdot [D] \quad (Eq. 6)$$

Substituting Eq. 6 into Eq. 5 produces the following:

$$[D] = \{[Total] - (K_{alb} \cdot [Alb] + 1) \cdot [D]\} \div K_{DBP} \div ([Total\ DBP] - \{[Total] - (K_{alb} \cdot [Alb] + 1) \cdot [D]\})$$

The equation is now limited to known constants ( $K_{DBP}$  and  $K_{alb}$ ), measured values ( $[Total\ DBP]$ ,  $[Alb]$ , and  $[Total]$ ) and the dependent variable for free vitamin D  $[D]$ . After propagating products and several rearrangements we can further simplify this to fit the form of a second-degree polynomial:

$$ax^2 + bx + c = 0$$

Where  $x = [D]$  = the concentration of free 25(OH)-Vitamin D

$$a = K_{DBP} \cdot K_{alb} \cdot [Alb] + K_{DBP}$$

$$b = K_{\text{DBP}} \cdot [\text{Total DBP}] - K_{\text{DBP}} \cdot [\text{Total}] + K_{\text{alb}} \cdot [\text{Alb}] + 1$$

$$c = -[\text{Total}]$$

This polynomial may be solved for [D] using the quadratic equation:

$$[D] = \frac{-b + \sqrt{b^2 - 4ac}}{2a}$$

After solving for free 25(OH)-vitamin D, we may then use Eq. 2 to calculate the concentration of bioavailable (non-DBP bound vitamin):

$$[\text{Bio}] = [D] + [D_{\text{Alb}}] = (K_{\text{alb}} \cdot [\text{Alb}] + 1) \cdot [D] \quad (\text{Eq. 7})$$

### EXAMPLE CALCULATION

$$\text{Total 25(OH)-vitamin D} = [\text{Total}] = 40 \text{ ng/mL} = 1.0 \times 10^{-7} \text{ mol/L}$$

$$\text{Total serum DBP} = [\text{Total DBP}] = 250 \text{ ug/mL} = 4.3 \times 10^{-6} \text{ mol/L}$$

$$\text{Total serum albumin} = [\text{Alb}] = 4.3 \text{ g/dL} = 6.4 \times 10^{-4} \text{ mol/L}$$

$$K_{\text{alb}} = 6 \times 10^5 \text{ M}^{-1}$$

$$K_{\text{DBP}} = 7.0 \times 10^8 \text{ M}^{-1}$$

$$a = 2.7 \times 10^{11}$$

$$b = 3325$$

$$c = -1 \times 10^{-7}$$

$$\text{Calculated concentration of free 25(OH)D} = 3.01 \times 10^{-11} \text{ mol/L} = 12.1 \text{ pg/mL}$$

$$\text{Calculated concentration of bioavailable 25(OH)D} = 1.09 \times 10^{-8} \text{ mol/L} = 4.6 \text{ ng/mL}$$
